# Supplementary material for: Enlarging the frequency threshold range of Bienenstock–Cooper–Munro rules in WOx-based memristive synapses by Al doping
Source: Royal Society of Chemistry journal article supplement (doi:10.1039/d4tc04069d), 2025-01-01
Supplement: d4tc04069d1.pdf [file d4tc04069d1.pdf]

## Supporting Information

# Enlarging the frequency threshold range of Bienenstock-Cooper-Munro rules in $\text{WO}_x$ -based memristive synapses by Al doping

Shimin Hu<sup>1</sup>, Jiayi Liu<sup>1</sup>, Linyan Yao<sup>1</sup>, Hongjia Song<sup>1,\*</sup>, Xiangli Zhong<sup>1</sup>, Jinbin Wang<sup>1</sup>

<sup>1</sup>School of Materials Science and Engineering, Xiangtan University, Xiangtan, Hunan, 411100, China

\*Corresponding Author's E-mail addresses: hjsong@xtu.edu.cn

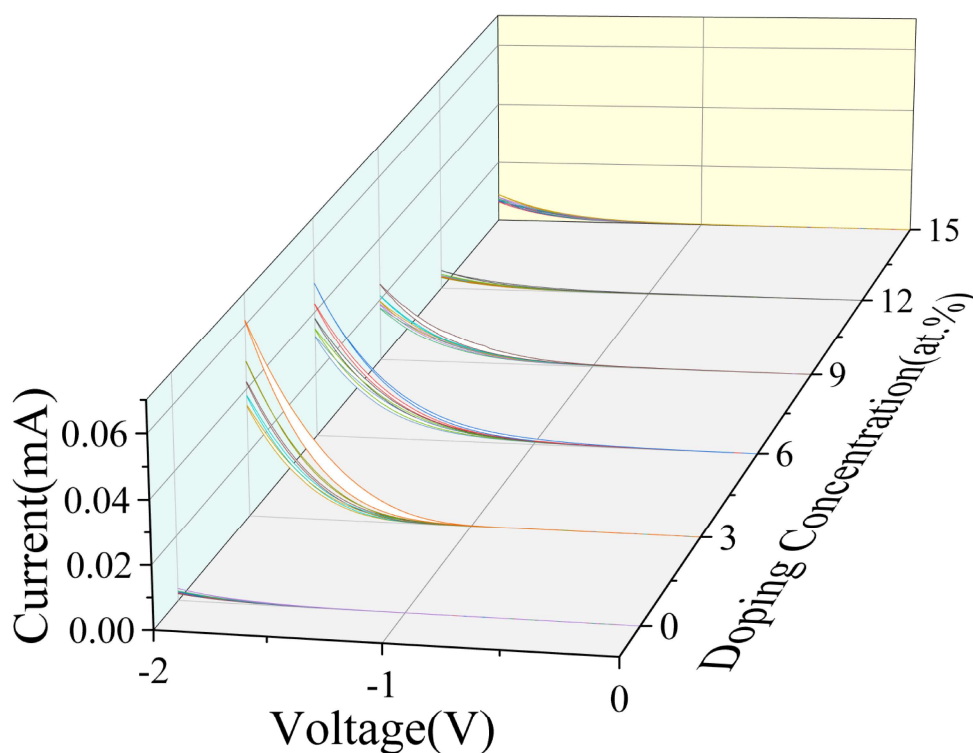

Figure S1. *I-V* characteristic curves of  $\text{WO}_x$  based devices with different Al doping concentrations in negative voltage direction.

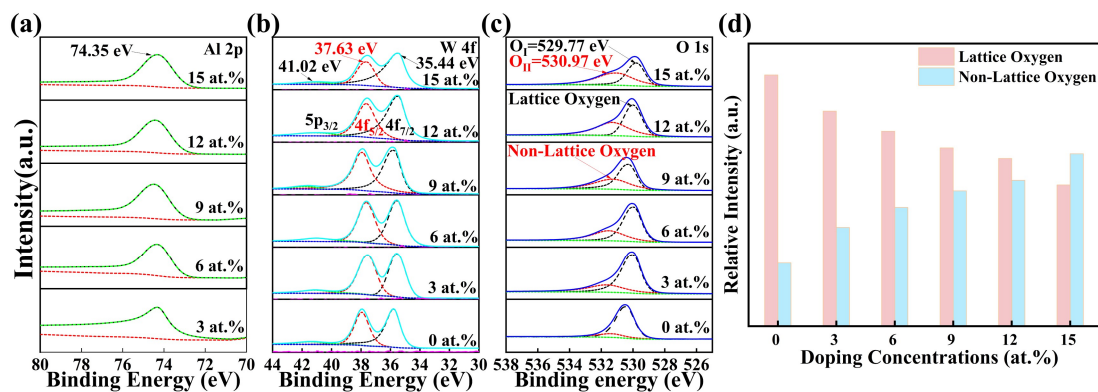

Figure S2. XPS spectra of a) Al 2p and b) W 4f and c) O 1s core levels of Al:WO<sub>x</sub> films. d) The relative content statistics of lattice oxygen and non-lattice oxygen of Al:WO<sub>x</sub> films.

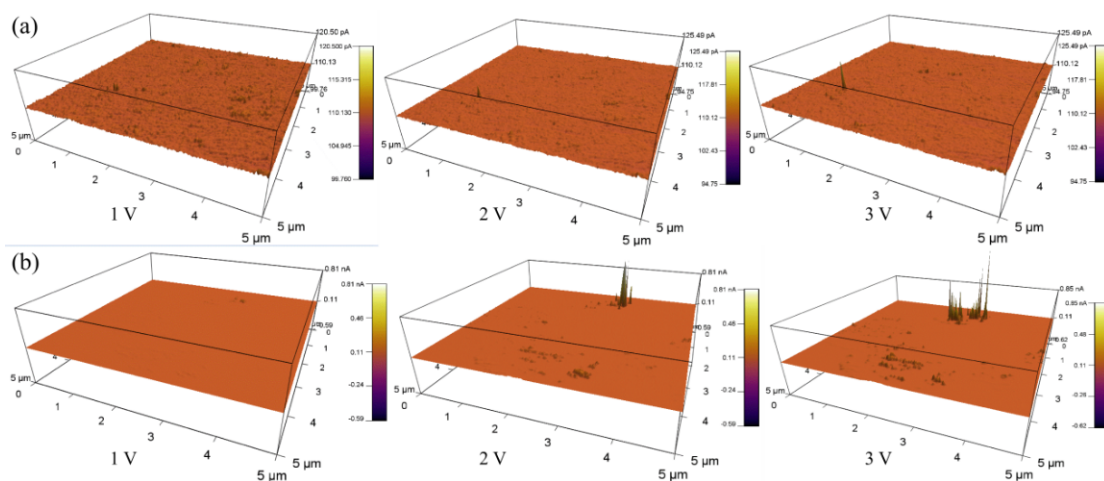

Figure S3. C-AFM test results at 1-3 V of the device a) Au/WO<sub>x</sub>/Ti and b) Au/Al:WO<sub>x</sub>(9 at.%) /Ti.
